# Enzyme Efficiency but Not Thermostability Drives Cefotaxime Resistance Evolution in TEM-1 $\beta$ -Lactamase

Jennifer L. Knies,<sup>†</sup> Fei Cai,<sup>‡</sup> and Daniel M. Weinreich\*

Department of Ecology and Evolutionary Biology, Brown University, Providence, RI

<sup>†</sup>Present address: Department of Molecular Biology and Chemistry, Christopher Newport University, Newport News, VA

<sup>‡</sup>Present address: Women's and Infants Hospital, and Warren Alpert Medical School, Brown University, Providence, RI

Associate editor: Miriam Barlow

\*Corresponding author: E-mail: daniel\_weinreich@brown.edu.

## Abstract

A leading intellectual challenge in evolutionary genetics is to identify the specific phenotypes that drive adaptation. Enzymes offer a particularly promising opportunity to pursue this question, because many enzymes' contributions to organismal fitness depend on a comparatively small number of experimentally accessible properties. Moreover, on first principles the demands of enzyme thermostability stand in opposition to the demands of catalytic activity. This observation, coupled with the fact that enzymes are only marginally thermostable, motivates the widely held hypothesis that mutations conferring functional improvement require compensatory mutations to restore thermostability. Here, we explicitly test this hypothesis for the first time, using four missense mutations in TEM-1  $\beta$ -lactamase that jointly increase cefotaxime Minimum Inhibitory Concentration (MIC)  $\sim$ 1500-fold. First, we report enzymatic efficiency ( $k_{\text{cat}}/K_M$ ) and thermostability ( $T_m$ , and thence  $\Delta G$  of folding) for all combinations of these mutations. Next, we fit a quantitative model that predicts MIC as a function of  $k_{\text{cat}}/K_M$  and  $\Delta G$ . While  $k_{\text{cat}}/K_M$  explains  $\sim$ 54% of the variance in cefotaxime MIC ( $\sim$ 92% after log transformation),  $\Delta G$  does not improve explanatory power of the model. We also find that cefotaxime MIC rises more slowly in  $k_{\text{cat}}/K_M$  than predicted. Several explanations for these discrepancies are suggested. Finally, we demonstrate substantial sign epistasis in MIC and  $k_{\text{cat}}/K_M$ , and antagonistic pleiotropy between phenotypes, in spite of near numerical additivity in the system. Thus constraints on selectively accessible trajectories, as well as limitations in our ability to explain such constraints in terms of underlying mechanisms are observed in a comparatively "well-behaved" system.

**Key words:** enzyme evolution,  $\beta$ -lactamase, functional synthesis, drug-resistance evolution, sign epistasis, antagonistic pleiotropy.

## Introduction

To first approximation, proteins evolve by the sequential substitution of individual missense mutations (Maynard Smith 1970), motivating interest in the underlying biochemical and biophysical determinants of such events (Dean and Thornton 2007; Harms and Thornton 2013). For example the mechanistic basis of adaptation has been explored in enzymes [Lunzer et al. (2005) in isopropyl malate dehydrogenase; Couñago et al. (2006, 2008), Tomatis et al. (2008), and Peña et al. (2010) in adenylate kinase; Walkiewicz et al. (2012) in a tetracycline-degrading enzyme; Meini et al. (2015) in metallo- $\beta$ -lactamase; Bershtein et al. (2015) and Rodrigues et al. (2016) in dihydrofolate reductase], cellular receptors [Bridgham et al. (2009) in corticoid receptors; Rosenblum et al. (2010) in Mc1r; Baldwin et al. (2014) in sweet taste receptors], hemoglobin (Tufts et al. 2015), two-component signaling pathways (Capra et al. 2012), and fluorescent proteins (Field and Matz 2010).

Enzymes in particular are faced with an intrinsic tension between thermostability and catalytic activity. As reviewed by Beadle and Shoichet (2002), thermostability requires a tightly packed core of hydrophobic residues surrounded by a shell of exposed hydrophilic residues, together with

interior hydrogen bonding and pairing of opposite charges. On the other hand, catalytic activity depends on exposed hydrophobic residues, sequestration of charge groups from solvent water, clustering of like charges, and unfilled hydrogen bond partners. Consistent with this view, it is now well established that the removal of catalytic residues usually stabilizes an enzyme (Zhi et al. 1991; Meiering et al. 1992; Shoichet et al. 1995), while mutations endowing an enzyme with novel function are generally destabilizing (Tokuriki et al. 2008). Mutations such as these, which simultaneously affect two or more phenotypes (e.g., activity and thermostability) are said to act pleiotropically. Moreover, most enzymes are only marginally thermostable (DePristo et al. 2005; Zeldovich et al. 2007; Tokuriki and Tawfik 2009). Together, these observations motivate the widespread hypothesis that enzyme adaptation should require both functionally beneficial but thermodynamically destabilizing mutations, and compensatory stabilizing mutations (Orencia et al. 2001; Wang et al. 2002; DePristo et al. 2005; Tokuriki and Tawfik 2009).

Here, we explicitly test this hypothesis for the first time, using cefotaxime resistance evolution in TEM-1

© The Author 2017. Published by Oxford University Press on behalf of the Society for Molecular Biology and Evolution.

This is an Open Access article distributed under the terms of the Creative Commons Attribution Non-Commercial License (<http://creativecommons.org/licenses/by-nc/4.0/>), which permits non-commercial re-use, distribution, and reproduction in any medium, provided the original work is properly cited. For commercial re-use, please contact [journals.permissions@oup.com](mailto:journals.permissions@oup.com)

Open Access

$\beta$ -lactamase.  $\beta$ -lactamases are enzymes that hydrolyze otherwise toxic  $\beta$ -lactam antibiotics such as penicillin and its cognates (Walsh 2003).  $\beta$ -lactamases in *E. coli* and other gram-negative bacteria have long served as a model system for the quantitative, mechanistic dissection of mutational effects on fitness (Zimmermann and Rosselet 1977; Nikaido and Normark 1987; Raquet et al. 1994; Blazquez et al. 1995; Raquet et al. 1995; Wang et al. 2002; Bloom et al. 2005; Bershtein et al. 2006; Singh and Dominy 2012; Jacquier et al. 2013; Firnberg et al. 2014; Dellus-Gur et al. 2015; Stiffler et al. 2015). The utility of  $\beta$ -lactamases in this work follows from their comparatively simple biological function (Frère et al. 1999).  $\beta$ -lactam antibiotics diffuse from the environment into the cell's periplasm, where they bind to and inactivate penicillin-binding proteins (PBPs), enzymes critical for bacterial cell wall maintenance.  $\beta$ -lactamase enzymes in turn are solely responsible for the hydrolysis of  $\beta$ -lactams, thereby allowing cells to survive in an otherwise lethal environment.

Specifically, by assuming that periplasmic  $\beta$ -lactam concentration is at equilibrium between diffusion and hydrolysis, Nikaido and Normark (1987) modeled the minimum inhibitory concentration (MIC) of antibiotic that blocks cell growth as

$$\text{MIC} = [S]_{\text{lethal}} + \frac{[S]_{\text{lethal}} \cdot k_{\text{cat}} \cdot [E]_{\text{active}}}{P \cdot A \cdot (K_M + [S]_{\text{lethal}})},$$

where  $[S]_{\text{lethal}}$  is the periplasmic  $\beta$ -lactam concentration that lethally inhibits the cell's PBPs in the absence of any  $\beta$ -lactamase,  $k_{\text{cat}}$  and  $K_M$  are the  $\beta$ -lactamase's turnover rate and Michaelis constant, respectively,  $[E]_{\text{active}}$  is the periplasmic concentration of catalytically active enzyme, and  $P$  and  $A$  are the cell's periplasmic permeability coefficient and surface area, respectively. Next, if  $[S]_{\text{lethal}} \ll \text{MIC}$  (i.e., that the enzyme confers substantial protection from the  $\beta$ -lactam)

$$\text{MIC} \approx Z \cdot \frac{k_{\text{cat}} \cdot [E]_{\text{active}}}{K_M + [S]_{\text{lethal}}}, \quad (1a)$$

where  $Z = \frac{[S]_{\text{lethal}}}{P \cdot A}$  is independent of  $\beta$ -lactamase allele. Further assuming  $K_M \gg [S]_{\text{lethal}}$  (i.e., that the  $\beta$ -lactamase is not saturated by substrate), we find

$$\text{MIC} \approx Z \cdot \frac{k_{\text{cat}} \cdot [E]_{\text{active}}}{K_M}. \quad (1b)$$

Additionally, the principled consideration of two-state folding of the  $\beta$ -lactamase (Bloom et al. 2004; Tokuriki and Tawfik 2009; Wylie and Shakhnovich 2011; Jacquier et al. 2013) suggests

$$[E]_{\text{active}} = \frac{[E]_{\text{total}}}{1 + e^{\Delta G/R \cdot T}}, \quad (2)$$

where  $[E]_{\text{total}}$  is the total cellular enzyme concentration,  $\Delta G$  is the Gibbs free energy of native-form folding,  $R$  is the gas constant and  $T$  is the temperature in degrees Kelvin. Finally, substituting Equation (2) into Equations (1b) yields

$$\text{MIC} \approx Z' \cdot \frac{k_{\text{cat}}}{K_M} \cdot \frac{1}{1 + e^{\Delta G/R \cdot T}}, \quad (3)$$

where  $Z' = [E]_{\text{total}} \cdot Z$  is again independent of  $\beta$ -lactamase allele.

In order to quantitatively test the mechanistic underpinnings of MIC suggested by Equation (3), we here report  $k_{\text{cat}}/K_M$  and  $\Delta G$  values for all 16 combinations of four missense mutations previously shown to increase the MIC of TEM-1 by more than three log-orders against the  $\beta$ -lactam cefotaxime (Hall 2002; Weinreich et al. 2006; Knies et al. in prep.). A second, more abstract motivation for this work stems from our earlier finding that while the phenotypic landscape of TEM-1 for cefotaxime MIC is single-peaked, most mutational trajectories to the highest resistance allele are selectively inaccessible (Weinreich et al. 2006). This is necessarily the consequence of the fact that at least some of these mutations are only conditionally beneficial (called sign epistasis, Weinreich et al. 2005). The hypothesis that catalytically beneficial mutations commonly require compensatory, stabilizing mutations immediately suggests a mechanism for widespread sign epistasis (Camps et al. 2007; Weinreich 2010; Weinreich and Knies 2013), and so we were keen to test its relevance in this system.

## Results

In order to understand the mechanistic basis of increased cefotaxime resistance achieved during the evolution of TEM-1  $\beta$ -lactamase (Stemmer 1994; Hall 2002), and more abstractly the source and generality of sign epistasis previously described in this system (Weinreich et al. 2006), we have now characterized the catalytic activity and thermostability of all  $4^2 = 16$  combinations of the four missense mutations involved. [The fifth mutation examined in Weinreich et al. (2006) lies 52 nucleotides upstream of the start codon and thus is unlikely to affect activity or thermostability.] Table 1 presents *in vitro* catalytic efficiencies for all 16 enzyme variants ( $k_{\text{cat}}/K_M$ , and where possible, independent measures of  $k_{\text{cat}}$  and  $K_M$ , all at 25 °C) against cefotaxime. Table 1 also presents melting temperature, van't Hoff enthalpy ( $T_m$  and  $\Delta H$ , respectively) and thence thermodynamic stabilities ( $\Delta G$  computed at 25 °C; see "Methods"), for each enzyme variant. MIC values (also measured at 25 °C) for the 16 g4205 alleles (see "Methods") from Knies et al. (in prep) are presented in table 2. Minimum and maximum values for all seven phenotypes are highlighted in underlined in tables 1 and 2.

### Statistical Significance of Mutational Effects on Phenotype

The 16 TEM-1 enzyme variants examined define  $4 \cdot 16/2 = 32$  pairs of mutationally adjacent alleles and  $\binom{16}{2} = 120$  pairs

without regard to mutational adjacency. No variance estimates for our independent  $k_{\text{cat}}$  and  $K_M$  measurements were possible for the  $----$ ,  $---+$  or  $++---$  variants (table 1; + and - represent the presence or absence of each mutation in N-to-C order). This leaves only 22 mutationally

**Table 1.** Biochemical and Biophysical Phenotypes for TEM-1  $\beta$ -Lactamase Alleles (Minimum and Maximum Values Shown in Underlined).

| Mutation <sup>a,b</sup> |       | Kinetics against Cefotaxime |       |                                                   | Biophysical phenotypes <sup>d</sup> |                                        |                                        |                                   |                                |                               |
|-------------------------|-------|-----------------------------|-------|---------------------------------------------------|-------------------------------------|----------------------------------------|----------------------------------------|-----------------------------------|--------------------------------|-------------------------------|
| A42G                    | E104K | M182T                       | G238S | $k_{\text{cat}}/K_M^c$ ( $M^{-1} s^{-1}$ @ 25 °C) | $n^e$                               | $k_{\text{cat}}$ ( $s^{-1}$ )          | Nonlinear estimates <sup>d</sup>       | $T_m$ (°C)                        | $\Delta H$ (kcal/mol °C)       | $\Delta G$ (kcal/mol @ 25 °C) |
|                         |       |                             |       |                                                   |                                     | $K_M$ ( $M^{-1}$ )                     |                                        |                                   |                                |                               |
| -                       | -     | -                           | -     | $(1.5 \pm 0.170) \times 10^2$                     | 1                                   | $1.7 \times 10^{-1} \pm \text{n.d.}^f$ | $7.5 \times 10^{-4} \pm \text{n.d.}^f$ | $56.42 \pm 0.20$                  | -78. $\pm$ 5.1                 | $-7.5 \pm 0.483$              |
| -                       | -     | -                           | +     | $(2.2 \pm 0.221) \times 10^4$                     | 9                                   | $(1.43 \pm 0.00498) \times 10^1$       | $(7. \pm 1.51) \times 10^{-4}$         | <u><math>53.0 \pm 0.26</math></u> | -62. $\pm$ 5.2                 | $-5.3 \pm 0.42$               |
| -                       | -     | +                           | -     | $(1.2 \pm 0.270) \times 10^2$                     | 0                                   | n.d. <sup>f</sup>                      | n.d. <sup>f</sup>                      | <u><math>62.4 \pm 0.08</math></u> | $(-1.0 \pm 0.011) \times 10^2$ | $-11. \pm 0.11$               |
| -                       | -     | +                           | +     | $(3.6 \pm 0.517) \times 10^4$                     | 7                                   | $(1.7 \pm 0.357) \times 10^1$          | $(4. \pm 0.988) \times 10^{-4}$        | <u><math>59.7 \pm 0.08</math></u> | $(-7. \pm 1.0) \times 10^2$    | $-7. \pm 1.1$                 |
| -                       | +     | -                           | -     | $(6. \pm 1.05) \times 10^2$                       | 3                                   | $3.9 \pm 0.18$                         | $(5. \pm 2.9) \times 10^{-3}$          | <u><math>56.3 \pm 0.24</math></u> | -75. $\pm$ 6.6                 | $-7.1 \pm 0.62$               |
| -                       | +     | -                           | +     | $(2.0 \pm 0.133) \times 10^4$                     | 9                                   | $9.21 \pm 7.43 \times 10^{-3}$         | $(4.6 \pm 0.376) \times 10^{-4}$       | <u><math>53.1 \pm 0.33</math></u> | -51. $\pm$ 3.7                 | $-4.4 \pm 0.29$               |
| -                       | +     | +                           | -     | $(5.4 \pm 0.420) \times 10^2$                     | 7                                   | $2.04 \pm 5.08 \times 10^{-2}$         | $(3.5 \pm 0.882) \times 10^{-3}$       | <u><math>61.7 \pm 0.54</math></u> | $(-8. \pm 1.7) \times 10^1$    | $-9. \pm 2.0$                 |
| -                       | +     | +                           | +     | $(5.5 \pm 0.146) \times 10^5$                     | 10                                  | $(8.19 \pm 0.00149) \times 10^1$       | $(1.51 \pm 0.0508) \times 10^{-4}$     | <u><math>59.2 \pm 0.16</math></u> | -89. $\pm$ 7.9                 | $-9.3 \pm 0.81$               |
| +                       | -     | -                           | -     | $(2.0 \pm 0.498) \times 10^2$                     | 1                                   | $2.5 \times 10^{-1} \pm \text{n.d.}^f$ | $1.1 \times 10^{-3} \pm \text{n.d.}^f$ | <u><math>57.2 \pm 0.11</math></u> | $(-1.1 \pm 0.68) \times 10^2$  | $-11. \pm 0.68$               |
| +                       | -     | -                           | +     | $(2.3 \pm 0.204) \times 10^5$                     | 10                                  | $(2.13 \pm 0.00125) \times 10^1$       | $(1.1 \pm 0.213) \times 10^{-4}$       | <u><math>55.0 \pm 0.40</math></u> | -51. $\pm$ 2.2                 | $-4.7 \pm 0.24$               |
| +                       | -     | -                           | -     | $(4.5 \pm 0.301) \times 10^2$                     | 4                                   | $1.2 \pm 2.6 \times 10^{-2}$           | $(2.5 \pm 0.57) \times 10^{-3}$        | <u><math>64.3 \pm 0.38</math></u> | $(-1.7 \pm 0.34) \times 10^2$  | $-21. \pm 4.1$                |
| +                       | -     | +                           | +     | $(2.9 \pm 0.231) \times 10^4$                     | 8                                   | $9.42 \pm 7.25 \times 10^{-3}$         | $(3.1 \pm 0.296) \times 10^{-4}$       | <u><math>61.4 \pm 0.14</math></u> | $(-1.1 \pm 0.89) \times 10^2$  | $-12. \pm 0.92$               |
| +                       | +     | -                           | -     | $(2.2 \pm 0.313) \times 10^3$                     | 10                                  | $7.6 \pm 1.86 \times 10^{-1}$          | $(3.1 \pm 0.581) \times 10^{-3}$       | <u><math>57.6 \pm 0.22</math></u> | -80. $\pm$ 5.3                 | $-7.8 \pm 0.48$               |
| +                       | +     | -                           | +     | $(2.2 \pm 0.222) \times 10^5$                     | 7                                   | $(2.61 \pm 0.00429) \times 10^1$       | $(1.1 \pm 0.241) \times 10^{-4}$       | <u><math>53.8 \pm 0.09</math></u> | -61. $\pm$ 3.1                 | $-5.3 \pm 0.27$               |
| +                       | +     | +                           | -     | $(1.23 \pm 0.0596) \times 10^3$                   | 3                                   | $6.5 \pm 1.2 \times 10^{-1}$           | $(5. \pm 1.9) \times 10^{-3}$          | <u><math>63.2 \pm 0.27</math></u> | $(-1.0 \pm 0.87) \times 10^2$  | $-11.8 \pm 0.92$              |
| +                       | +     | +                           | +     | $(2.9 \pm 0.565) \times 10^5$                     | 9                                   | $(2.08 \pm 0.000877) \times 10^1$      | $(8. \pm 1.16) \times 10^{-5}$         | <u><math>60.7 \pm 0.24</math></u> | -89. $\pm$ 6.1                 | $-9.5 \pm 0.71$               |

<sup>a</sup>Numbering as in Ambler et al. (1991). One-letter amino acid abbreviations used here: A = alanine; G = glycine; E = glutamic acid; K = lysine; M = methionine; T = threonine and S = serine.

<sup>b</sup>Clinical designations shown in table 2.

<sup>c</sup>Mean  $\pm$  s.e.m. across  $n = 10$  replicates. For each replicate, the best fitting model (linear or nonlinear) was chosen by AIC<sub>C</sub> score, and for each allele mean and standard error of  $k_{\text{cat}}/K_M$  across best-model/fit estimates are reported.

<sup>d</sup>Mean  $\pm$  s.e.m. across those replicates in which non-linear model had better AIC<sub>C</sub> score.

<sup>e</sup>Number of replicates in which non-linear model had better AIC<sub>C</sub> score.

<sup>f</sup>Too few replicates to allow estimation of this quantity.

<sup>g</sup>Mean  $\pm$  s.e.m. across  $n = 9$  replicates for TEM-1 and  $n = 3$  for all other alleles.

adjacent and 78 total pairwise comparisons for which significant differences in those phenotypes can be assessed. The numbers of these pairwise differences that are statistically significant after Bonferroni correction (Holm 1979) for each phenotype examined are presented in table 3.

All differences in cefotaxime MIC assessed at 25 °C between mutationally adjacent  $\beta$ -lactamase alleles are statistically significant at  $P < 0.05$  after sequential Bonferroni correction (Knies et al., in prep.).

### Modeling MIC as a Function of Biophysics and Biochemistry

We first regressed observed MIC values at 25 °C (table 2) against those predicted by Equation 3 using data from table 1. This linear regression exhibited an  $R^2$  of 0.54. However the regression of MIC against  $k_{\text{cat}}/K_M$  alone has exactly the same explanatory power (fig. 1). This can be understood by

**Table 2.** Minimum Inhibitory Concentration (MIC) for TEM-1  $\beta$ -Lactamase Alleles<sup>a</sup> Against Cefotaxime (Minimum and Maximum Values Shown in Underlined).

| Mutation <sup>b</sup> |       |       |       | Clinical Designation <sup>c</sup> | MIC <sup>d</sup> ( $\mu\text{g}/\text{mL}$ ) |
|-----------------------|-------|-------|-------|-----------------------------------|----------------------------------------------|
| A42G                  | E104K | M182T | G238S |                                   |                                              |
| -                     | -     | -     | -     | TEM-1                             | 5.7                                          |
| -                     | -     | -     | +     | TEM-19                            | $2.6 \times 10^2$                            |
| -                     | -     | +     | -     | TEM-135                           | 8.0                                          |
| -                     | -     | +     | +     | TEM-20                            | $2.6 \times 10^2$                            |
| -                     | +     | -     | -     | TEM-17                            | 11.                                          |
| -                     | +     | -     | +     | TEM-15                            | $2.0 \times 10^3$                            |
| -                     | +     | +     | -     | TEM-106                           | 11.                                          |
| -                     | +     | +     | +     | TEM-52                            | $4.1 \times 10^3$                            |
| +                     | -     | -     | -     | None                              | 5.7                                          |
| +                     | -     | -     | +     | None                              | $7.2 \times 10^2$                            |
| +                     | -     | +     | -     | None                              | <u>4.0</u>                                   |
| +                     | -     | +     | +     | None                              | $7.2 \times 10^2$                            |
| +                     | +     | -     | -     | None                              | 32.                                          |
| +                     | +     | -     | +     | None                              | $2.9 \times 10^2$                            |
| +                     | +     | +     | -     | None                              | 23.                                          |
| +                     | +     | +     | +     | None                              | <u><math>8.2 \times 10^3</math></u>          |

<sup>a</sup>Data from Knies et al. (in prep.).

<sup>b</sup>Numbering as in Ambler et al. (1991). One-letter amino acid abbreviations used here: A = alanine; G = glycine; E = glutamic acid; K = lysine; M = methionine; T = threonine and S = serine.

<sup>c</sup>From Jacoby and Bush (2005).

<sup>d</sup>Three replicate measures gave identical results.

**Table 3.** Fraction of Statistically Significant Mutational Effects on Phenotype<sup>a</sup>.

| Phenotype              | Mutationally Adjacent |            |             | All Comparisons |            |             |
|------------------------|-----------------------|------------|-------------|-----------------|------------|-------------|
|                        | $P < 0.05$            | $P < 0.01$ | $P < 0.001$ | $P < 0.05$      | $P < 0.01$ | $P < 0.001$ |
| $k_{\text{cat}}/K_M^b$ | 23/32                 | 19/32      | 15/32       | 104/120         | 83/120     | 71/120      |
| $k_{\text{cat}}^c$     | 20/22                 | 20/22      | 20/22       | 70/78           | 67/78      | 67/78       |
| $K_M^c$                | 6/22                  | 6/22       | 3/22        | 13/78           | 8/78       | 3/78        |
| $T_m^b$                | 16/32                 | 10/32      | 8/32        | 80/120          | 62/120     | 50/120      |
| $\Delta G^b$           | 5/32                  | 5/32       | 0/32        | 26/120          | 14/120     | 3/120       |

<sup>a</sup>After sequential Bonferroni correction (Holm 1979).

<sup>b</sup>Four mutations define  $4 \times 2^4/2 = 32$  mutationally adjacent pairs of TEM-1 variants and  $\binom{2^4}{2} = 120$  pairs of variants without regard to mutational adjacency.

<sup>c</sup>No independent variance estimates were possible for three TEM-1 variants (table 1), reducing the number of mutationally adjacent comparisons to 22 and to 78 without regard to mutational adjacency.

observing first that  $\Delta G$  has a sharply sigmoidal influence on  $[E]_{\text{active}}$  in Equation (2). For example, at 25 °C,  $\sim 99\%$  of all molecules with a thermostability of  $-2.7$  kcal/mol are predicted to be in their native, folded form. And empirically,  $\Delta G$  for all 16 TEM-1 variants (table 1) are significantly more negative than  $-2.7$  kcal/mol by a one-tailed  $t$ -test ( $P < 0.05$  after Bonferroni correction). In other words, at physiological temperatures, our *in vitro* thermodynamic stability measures imply that all TEM-1 variants are essentially 100% folded.

Note that  $\beta$ -lactamase kinetic results (table 1) were normalized by  $\mu\text{g}$  of total soluble protein (see “Methods”). However, this finding—that all 16 TEM-1 variants are essentially fully folded at 25 °C—implies that these data can also be regarded as having been normalized by  $\mu\text{g}$  of active protein, as assumed by Equation (1).

### Additivity and Interaction in Mutational Effects

Traditionally, genetics has examined individual mutational effects on phenotype together with epistatic interactions between pairs of mutations. However in principle any subset of  $k$  mutations can exhibit epistasis (Weinreich et al. 2013). The Walsh transformation (see “Methods”) decomposes a data

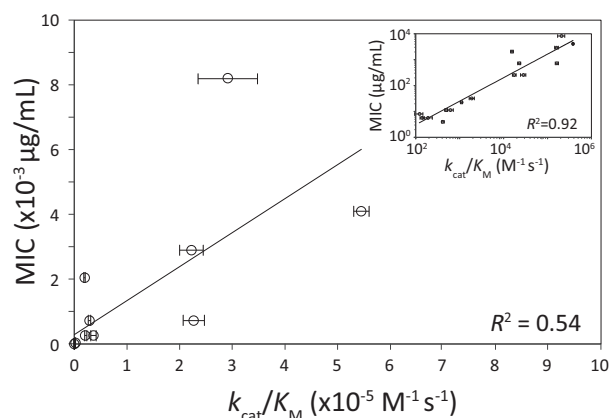

**Fig. 1.** Correlation between MIC and  $k_{\text{cat}}/K_M$ . Error bars in  $k_{\text{cat}}/K_M$  represent standard error across  $n = 10$  replicates. No variance was observed across  $n = 3$  MIC assays. MIC results are from g4205 alleles (see “Methods”; qualitatively similar results observed for MIC data from 4205a alleles). Best-fit linear regression  $\text{MIC} = .0105 \times (k_{\text{cat}}/K_M) + 288.42$ . Inset: same data on log-log plot. Best-fit power-law regression:  $\text{MIC} = 0.0553 \times (k_{\text{cat}}/K_M)^{0.8713}$ .



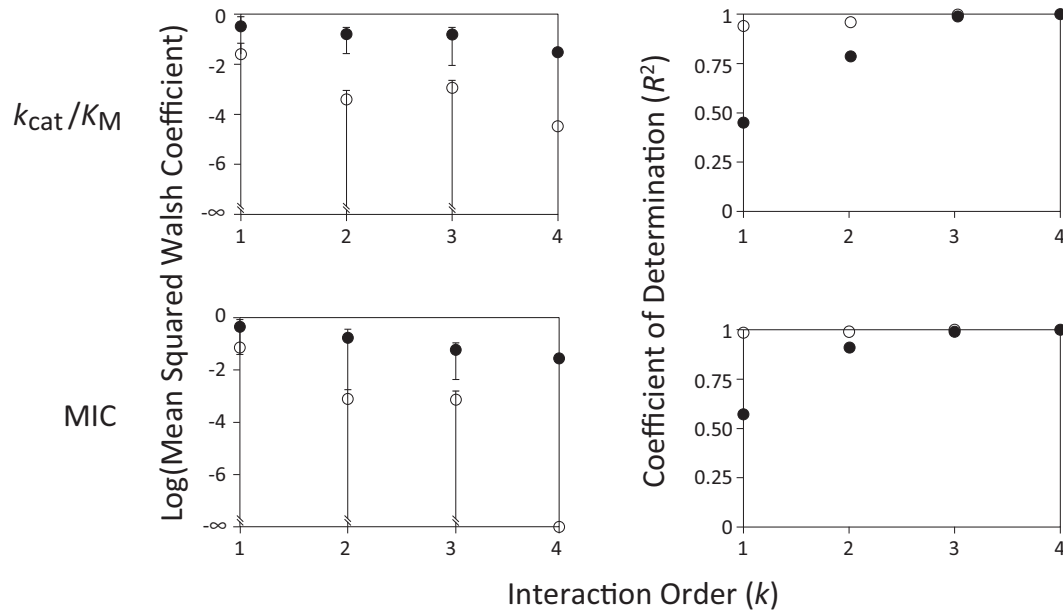

**Fig. 2.** Epistasis in  $k_{cat}/K_M$  and MIC. Given the phenotype for each of the  $2^L$  combinations of  $L$  mutations, epistatic interactions associated with all subsets of  $0 \leq k \leq L$  mutations can be computed as Walsh coefficients (see “Methods”). Interactions among subsets of  $k$  mutations are described as  $k^{\text{th}}$ -order. (Left) Mean squared Walsh coefficients ( $\pm$  standard deviation across  $\binom{L}{k}$  values; those that extend to the  $x$ -axis overlap 0) as a function of order. For each phenotype, Walsh coefficients were normalized to the mean value across all alleles to allow comparisons across phenotypes. First and second order terms are analogous to classical selection coefficients and classical pairwise epistatic terms, respectively (see “Methods”). Filled symbols: raw phenotypic data; open symbols: log-transformed data. (Right) The coefficient of determination ( $R^2$ ) between observed phenotypes and those predicted by successive models incorporating only the lowest order  $k = 1, 2, \dots, L$  terms. Filled symbols: raw phenotypic data; open symbols: log-transformed data.

set containing phenotypes for all  $2^L$  combinations of  $L$  mutations into the orthogonal contributions to phenotype due to each subset of mutations of size 1 to  $L$ . These contributions are called Walsh coefficients, and the order  $1 \leq k \leq L$  of each Walsh coefficient is the size of the corresponding subset of mutations. Thus first-order coefficients ( $k = 1$ ) capture the average effect of each mutation in isolation and are analogous to selection coefficients, second-order coefficients ( $k = 2$ ) capture the average interaction between each pair of mutations and are analogous to traditional pairwise effects, and so on (Weinreich et al. 2013).

Because thermostability does not influence MIC, we only report the mean squared Walsh coefficient as a function of interaction order  $k$  for  $k_{cat}/K_M$  and MIC (fig. 2, left). We note first that for the raw  $k_{cat}/K_M$  and MIC data, mean interaction terms (those of order  $k > 1$ ) are comparable to mean effects of individual mutations (order  $k = 1$ ). In other words, substantial epistasis is observed in these data. Interestingly after log-transformation, mean interaction terms are  $\sim 100\times$  smaller than mean individual mutational effects in these two datasets (fig. 2, left: compare open and filled symbols). This finding implies near additivity in mutational effect on log-transformed data, a point to which we return in the “Discussion” section. Mean epistatic terms for  $T_m$  are  $\sim 100\times$  smaller than mean effects of individual mutations both before and after log-transformation (data not shown). In other words, we observe almost no epistasis in  $T_m$ .

Figure 2, right presents another way of visualizing epistatic contributions to these phenotypes. Here, we report the coefficient of determination ( $R^2$ ) between observed phenotypes and those predicted by successive models incorporating only the lowest  $k = 1, 2, \dots, L$  interaction terms. Consistent with results presented in figure 2, left, we observe that the additive model ( $k = 1$ , accounting only for the effects of mutations in isolation) does a poor job of explaining raw values of  $k_{cat}/K_M$  or MIC ( $R^2 < 0.60$ ). On the other hand, the additive model already does a very good job ( $R^2 > 0.94$ ) of predicting observed phenotypes for log-transformed values of  $k_{cat}/K_M$  and MIC. In both cases,  $R^2$  increases as additional interaction terms are added to the model, and is numerically equal to 1 when all terms are included (as it must; Weinreich et al. 2013).

### Sign Epistasis and Selective Constraints on $k_{cat}/K_M$ and MIC

Sign epistasis is necessary (though not sufficient) for multiple maxima on any landscape, and always constrains natural selection by reducing the number of selectively accessible trajectories to high-fitness alleles [Weinreich et al. 2005; though see Palmer et al. (2015) for a more nuanced perspective]. Cases of sign epistasis for  $k_{cat}/K_M$  and MIC are enumerated in table 4. The density of sign epistasis (Methods) for  $k_{cat}/K_M$  is  $11/32 = 34\%$ ; this figure drops slightly to  $7/32 = 22\%$  for

**Table 4.** Sign of Mutational Effect on  $k_{cat}/K_M$  and MIC against Cefotaxime, and Antagonistic Pleiotropy between These Two Phenotypes.

| TEM-1 Genetic Background |       |       |       | Mutational Effect on $k_{cat}/K_M$ |                |                |       | Mutational Effect on MIC <sup>a</sup> |       |       |       | Antagonistic Pleiotropy <sup>b</sup> |       |       |       |
|--------------------------|-------|-------|-------|------------------------------------|----------------|----------------|-------|---------------------------------------|-------|-------|-------|--------------------------------------|-------|-------|-------|
| A42G                     | E104K | M182T | G238S | A42G                               | E104K          | M182T          | G238S | A42G                                  | E104K | M182T | G238S | A42G                                 | E104K | M182T | G238S |
| -                        | -     | -     | -     | ↑ <sup>c</sup>                     | ↑              | ↓ <sup>c</sup> | ↑     | 0                                     | ↑     | ↑     | ↑     | No                                   | No    | Yes   | No    |
| -                        | -     | -     | +     | ↑                                  | ↓ <sup>c</sup> | ↑ <sup>c</sup> | ↑     | ↑                                     | ↑     | 0     | ↑     | No                                   | Yes   | No    | No    |
| -                        | -     | +     | -     | ↑                                  | ↑              |                | ↑     | ↓                                     | ↑     |       | ↑     | Yes                                  | No    |       | No    |
| -                        | -     | +     | +     | ↓ <sup>c</sup>                     | ↑              |                | ↑     | ↑                                     | ↑     |       | ↑     | Yes                                  | No    |       | No    |
| -                        | +     | -     | -     | ↑                                  |                | ↓ <sup>c</sup> | ↑     | ↑                                     |       | ↓     | ↑     | No                                   |       | No    | No    |
| -                        | +     | -     | +     | ↑                                  |                | ↑              | ↑     | ↑                                     |       | ↑     | ↑     | No                                   |       | No    | No    |
| -                        | +     | +     | -     | ↑                                  |                |                | ↑     | ↑                                     |       |       | ↑     | No                                   |       |       | No    |
| -                        | +     | +     | +     | ↓                                  |                |                | ↑     | ↑                                     |       |       | ↑     | Yes                                  |       |       | No    |
| +                        | -     | -     | -     |                                    | ↑ <sup>c</sup> | ↑              | ↑     |                                       | ↑     | ↓     | ↑     |                                      | No    | Yes   | No    |
| +                        | -     | -     | +     |                                    | ↓ <sup>c</sup> | ↓              | ↑     |                                       | ↑     | ↓     | ↑     |                                      | Yes   | No    | No    |
| +                        | -     | +     | -     |                                    | ↑              |                | ↑     |                                       | ↑     |       | ↑     |                                      | No    |       | No    |
| +                        | -     | +     | +     |                                    | ↑              |                | ↑     |                                       | ↑     |       | ↑     |                                      | No    |       | No    |
| +                        | +     | -     | -     |                                    |                | ↓ <sup>c</sup> | ↑     |                                       |       | ↓     | ↑     |                                      |       | No    | No    |
| +                        | +     | -     | +     |                                    |                | ↑ <sup>c</sup> | ↑     |                                       |       | ↑     | ↑     |                                      |       | Yes   | No    |
| +                        | +     | +     | -     |                                    |                |                | ↑     |                                       |       |       | ↑     |                                      |       |       | No    |
| +                        | +     | +     | +     |                                    |                |                | ↑     |                                       |       |       | ↑     |                                      |       |       | No    |
| Sums <sup>d</sup>        |       |       |       | 5                                  | 6              | 2              | 8     | 6                                     | 8     | 3     | 8     | 3                                    | 2     | 3     | 0     |

<sup>a</sup>All differences in MIC are statistically different at  $P < 0.05$  after sequential Bonferroni correction (Knies et al, in prep.).

<sup>b</sup>Cases in which the sign of mutational effect is significantly ( $P < 0.05$  after Bonferroni correction) positive on only one of  $k_{cat}/K_M$  and MIC.

<sup>c</sup>No significant effect at  $P < 0.05$  after sequential Bonferroni correction.

<sup>d</sup>For mutational effects, the number of cases in which mean mutational effect is significantly beneficial ( $P < 0.05$  after Bonferroni correction). For antagonistic pleiotropy, the number of cases in which sign of mutational effect is significantly positive ( $P < 0.05$  after Bonferroni correction) on only one of  $k_{cat}/K_M$  and MIC.

MIC. Moreover, our  $k_{cat}/K_M$  data (table 1) define a catalytic landscape with two peaks (- + + + and + - - +). Only three of the eight mutational trajectories from TEM-1 to the first of these are selectively accessible (i.e., exhibit a monotonic increase in  $k_{cat}/K_M$ ), although both trajectories to the second are. The MIC data exhibit a single maximum at (+ + + +), but only nine of the 24 mutational trajectories from TEM-1 are selectively accessible. These results are strongly reminiscent of earlier work in this system (Weinreich et al. 2006).

### Antagonistic Pleiotropy is Necessarily Responsible for Gross Discrepancies between MIC and $k_{cat}/K_M$ Landscapes

The first objective of this study was to quantitatively dissect mutational effects on MIC in terms of their underlying mechanistic components. However, a second motivation was to identify the mechanistic underpinnings of the selective constraint on cefotaxime resistance evolution induced by sign epistasis (Weinreich et al. 2006). We thus wondered, to what extent does sign epistasis in  $k_{cat}/K_M$  explain sign epistasis in MIC? [Trivially there are discrepancies, as we have just seen that the maxima for these phenotypes occur for different alleles (Weinreich et al. 2005).]

The answer necessarily lies in the incidence of antagonistic pleiotropy (AP) between phenotypes. Given our interest in adaptation, we follow Remold (2012) and restrict our definition of AP to those cases in which mutations significantly improve only one of the two phenotypes. Such cases represent particularly noteworthy failures of the approach captured by Equation (3), and are also enumerated in table 4. Mutations significantly affect  $k_{cat}/K_M$  and MIC in opposite directions in  $8/32 = 25\%$  of the mutationally adjacent

comparisons, and these cases of AP are distributed over three of the four mutations examined.

## Discussion

Natural selection acts simultaneously on variation in diverse phenotypes that together determine an organism's fitness. Thus dissecting mutational effects on these components of fitness is a central question in evolutionary genetics. In general this suite of phenotypes will span tremendous biological complexity, ranging from development and morphology to biochemistry and physiology to ecology. Proteins offer a much simplified model system in which to decompose fitness into its constituent components, because the relevant underlying phenotypes are often easily identified and assessed (Dean and Thornton 2007; Harms and Thornton 2013). As outlined above, enzymes in particular need to be both catalytically active and thermostable, and individual mutations commonly act pleiotropically (i.e., simultaneously) on both phenotypes. These facts motivate the widespread hypothesis that enzyme adaptation requires a succession of mutations that improve activity at the expense of thermostability, compensated for by mutations that restore thermostability (Wang et al. 2002; DePristo et al. 2005; Tokuriki and Tawfik 2009). Here we explicitly tested this hypothesis in TEM-1  $\beta$ -lactamase. In addition to our interest in understanding the mechanistic determinants of antibiotic resistance evolution, we hoped to test a second hypothesis. Namely, we wondered whether the need for compensatory stabilizing mutations might provide a generically important mechanistic explanation for sign epistasis in enzymes (Camps et al. 2007; Weinreich 2010; Weinreich and Knies 2013).

## Enzymatic Efficiency but Not Thermostability Drives Cefotaxime Resistance Evolution in TEM-1 $\beta$ -Lactamase

Perhaps our most surprising result is thus our first: that cefotaxime resistance evolution in TEM-1 is entirely unaffected by differences in melting temperature ( $T_m$ ) and thus thermodynamic stability ( $\Delta G$ ) among enzyme variants (fig. 1). On the contrary, melting temperature estimates for all 16 TEM-1 variants examined (table 1) are significantly ( $P < 0.05$  after Bonferroni correction) above 52 °C, i.e., greater than 15 °C above physiological temperatures. Seen another way, all enzyme variants examined here appear to be fully stable [Equation (2)], a finding corroborated computationally with FoldX (Van Durme et al. 2011) and PoPMuSic (Dehouck et al. 2011) (data not shown). We acknowledge that our empirical *in vitro* estimates for both  $\Delta G$  and  $T_m$  imply modestly (<10%) more thermostability than those made by others for subsets of these alleles (Wang et al. 2002; Kather et al. 2008; Dellus-Gur et al. 2013). However, these small differences are unable to reconcile the discrepancy between theory and data. Indeed, we observe no positive rank correlation between MIC and either  $\Delta G$  or  $T_m$  values (Spearman rank correlation coefficient  $\rho = 0.18$ ,  $P = 0.25$  and  $\rho = -0.30$ ,  $P = 0.90$  by one-tailed tests, respectively). This limits the possibility of a systematic bias between our *in vitro* stability assays and *in vivo* conditions.

This result is particularly noteworthy inasmuch as work in TEM-1 largely motivated the hypothesis that functionally beneficial mutations need to be compensated by stabilizing mutations (Orencia et al. 2001; see Fig. 6 in Wang et al. 2002). Importantly, our results do not contradict several closely related empirical principles about enzyme evolution, many also derived from work in TEM-1. First, there remains little doubt that deleterious mutations often act by reducing thermostability (Bloom et al. 2005; Bershtein et al. 2008; Jacquier et al. 2013; Firnberg et al. 2014). Relatedly, our findings do not undermine the idea that genetically increasing an enzyme's thermostability increases its robustness to deleterious mutations (Bloom et al. 2005; Bershtein et al. 2006; Besenmatter et al. 2007). Similarly, our results cast no doubt that thermostabilizing mutations are often beneficial on genetically destabilized alleles (Huang and Palzkill 1997; Sideraki et al. 2001; Hecky and Müller 2005; Kather et al. 2008; Brown et al. 2010), or when environmental temperature increases (Couñago et al. 2006; Couñago et al. 2008). In short, functional enzymes require adequate thermostability.

Rather, while catalytic residues *per se* substantially reduce any enzyme's thermostability (Zhi et al. 1991; Meiering et al. 1992; Shoichet et al. 1995), we find that the more modest stability consequences of the adaptive mutations examined here do not have appreciable physiological consequences. Indeed our conclusion that the 16 TEM-1 alleles examined are essentially fully folded echoes observations from several other systems. Recently, Thomas et al. (2010) considered five mutations in AmpC (another  $\beta$ -lactamase) that increase catalytic activity against cefotaxime between 100- and 200-fold. Those mutations were found to reduce stability by up to  $\sim 4.0$  kcal/mol. However, as in the case of our TEM-1 results,

the AmpC wild type has substantial thermostability ( $-14.0$  kcal/mol; Beadle et al. 1999), implying again that none of these mutations are capable of perturbing the physiological concentration of native-form folded enzyme [Equation (2)]. Similarly in CTX-M (yet another  $\beta$ -lactamase), three catalytically beneficial mutations were found to reduce  $T_m$ , but not below 47 °C (Chen et al. 2005; Patel et al. 2015), i.e., not below 10 °C above physiological temperatures. And, working in bacterial DHFR (the target of antifolates, another class of antimicrobial compound), Rodrigues et al. (2016) found that many beneficial alleles were destabilized, but in only one case did  $T_m$  drop below 48 °C. Moreover, our finding that TEM-1 thermostability is uncorrelated with MIC recapitulate results in three meta-analyses. Two found almost no correlation (positive or negative) between functional importance and  $\Delta\Delta G$  among beneficial mutations (Sánchez et al. 2006; Tokuriki et al. 2008) and a third found no clear pattern between effect on substrate affinity and  $\Delta\Delta G$  (Teilum et al. 2011).

Of course some functionally beneficial mutations do have physiologically significant pleiotropic effects on thermostability. For example, the temperature sensitivity of a chlorobiocin-resistance mutation in the GyrB subunit of the DNA gyrase enzyme in *E. coli* is mediated by thermostability (Blance et al. 2000). More recently, Gong et al. (2013) demonstrated that five missense mutations (out of 39) that differentiate H3N2 influenza nucleoproteins separated by 39 years of evolution reduce  $T_m$  to below 41.5 °C, with concomitant reductions in activity and viral growth. [In this case, each of these mutations was shown to have been compensated for by stabilizing mutations (Gong et al. 2013).] And increasing an allele's thermostability often increases the number of beneficial mutations in protein directed evolution experiments (Bershtein et al. 2006; Bloom et al. 2006; Fasan et al. 2007).

However, cefotaxime resistance evolution in TEM-1 appears to be unaffected by pleiotropic effects on enzyme thermostability, and in this respect TEM-1 is far from unique. This finding calls for a critical evaluation of the widespread hypothesis that the thermodynamically destabilizing effects of functionally beneficial mutations are a central aspect of enzyme evolution.

## Other Phenotypes that May Underlie Enzyme Evolution

If the mutational effects on enzymatic efficiency and thermostability modeled in Equation (3) are unable to fully explain the evolution of increased cefotaxime resistance in TEM-1, what other phenotypes might be involved? The first possibility is that mutational effects on thermostability are mediated by a mechanism other than that represented by Equation (2). Recently, elegant experimental work in a metallo- $\beta$ -lactamases has highlighted the role of loop destabilization as the enzyme evolves to more effectively bind and hydrolyze a novel substrate (Tomatis et al. 2008; González et al. 2016b). Conversely, Couñago et al. (2008) have documented the importance of loop stabilization in cofactor binding during the evolution of thermotolerance by adenylate kinase. And, Bershtein et al. (2012) find that destabilizing mutations



facilitate increased soluble oligomerization during the course of antifolate resistance evolution in the bacterial enzyme DHFR. More abstractly, several authors have noted that thermostability isn't necessarily a global property of an enzyme (Chen et al. 2005; Singh and Dominy 2012; Dellus-Gur et al. 2013); thus the mutational influence of  $\Delta G$  may not be mediated entirely by the effect captured by Equation (2).

Another (non-exclusive) possibility is that mutations mediate their effect on MIC via their influence on enzyme aggregation and degradation rates (DePristo et al. 2005). For example, again using TEM-1  $\beta$ -lactamase, Sideraki et al. (2001) demonstrate that the L76N mutation causes roughly half the enzyme's periplasmic fraction to become insoluble while also rendering the remaining fraction anomalously susceptible to proteolysis. However, adding M182T to the L76N mutant increases periplasmic concentration while reducing proteolysis-susceptibility, both to near wild-type levels. Importantly, the deleterious effects of L76N (and their compensation by M182T) are mediated not by native form thermostability, but rather by misfolding, leading to aggregation and proteolysis (Sideraki et al. 2001). Similarly, González et al. (2016a, 2016b) demonstrate that lipidation and the resulting membrane anchoring of the New Delhi metallo- $\beta$ -lactamase allele increases its thermostability and thus protects this enzyme from degradation.

More broadly, this line of thinking draws attention to the role of kinetic stability, i.e., an enzyme's propensity for misfolding (Baker and Agard 1994). The connection from misfolding, denaturation and aggregation to proteolysis (Sideraki et al. 2001; DePristo et al. 2005) suggest the possibility that kinetic stability may be an important component of enzyme function in the crowded and complex intracellular milieu in which they operate [see Peña et al. (2010) for a quantitative treatment of this phenomenon in adenylate kinase; Sanchez-Ruiz 2010; Meini et al. 2015]. Critically for our purposes, mutational influence on kinetic and thermodynamic stability need not be correlated (Vanhove et al. 1997; Sanchez-Ruiz 2010). Thus the poor correlation between thermostability and MIC observed here does not necessarily undermine the hypothesis that mutational effects on kinetic stability may be an important component of TEM-1 evolution.

A third (again, non-exclusive) explanation for the poor predictive value of Equation (3) is that substantial differences exist between *in vitro* thermostability values and the corresponding *in vivo* values underlying MIC assays. For example, Meini et al. (2015) recently found that thermostability of metallo- $\beta$ -lactamase in crude periplasmic extracts explains a great deal more of the observed variance in MIC than do *in vitro* CD measurements of the sort employed here. In that study, thermostability measured in periplasmic extracts were up to 10 °C lower than (and again importantly for our purposes, uncorrelated with) *in vitro* measurements.

Those authors hypothesize that interactions with other periplasmic components may be responsible for these effects. (See also González et al. 2016a) The same explanation has been offered for a more modest ( $\sim 1$  kcal/mol) reduction in *in vivo* thermostability compared with *in vitro* measurements reported for a bacterial cellular retinoic acid binding protein

(Ignatova et al. 2007). And, recently, Sarkar et al. (2013) demonstrated comparable differences in thermostability of chymotrypsin inhibitor 2 when cytosolic extracts were used in favor of a dilute buffer such as that used here. [Though no substantial differences between *in vivo* and *in vitro* thermostability assays were observed for the  $\lambda$  repressor protein (Ghaemmaghani and Oas 2001).] Indeed, *E. coli* cells are  $\sim 30$  to 40% macromolecules by weight (Zimmerman and Trach 1991), and a considerable theoretical and experimental literature exists on the entropic and enthalpic consequences of this fact for protein folding [e.g., see recent reviews by Zhou et al. (2008), Elcock (2010), Christiansen et al. (2013), Luby-Phelps (2013), Kuznetsova et al. (2014)].

Overall then, we conclude that several additional experimentally accessible phenotypes might plausibly contribute to mutational effects on cefotaxime MIC in TEM-1, including local stability and kinetic stability. Importantly for our purposes, these phenotypes are often uncorrelated with *in vitro*  $\Delta G$  values, meaning that our negative results do not undermine the explanatory potential for these alternative candidates. We also note that differences between *in vitro* and *in vivo* conditions may complicate interpretation of assays such as those employed here.

#### MIC Increases More Slowly than Linearly in $k_{\text{cat}}/K_M$

A second noteworthy result of ours is that our data are much more closely modeled by a power relationship whose exponent is less than unity (fig. 1 inset). As noted, a linear dependence of MIC on  $k_{\text{cat}}/K_M$  is expected from first principles [Equation (1b)], and this expectation has also received empirical support from work with deleterious mutations in TEM-1  $\beta$ -lactamase (Cantu and Palzkill 1998; Firnberg et al. 2014) as well as in the wild-type kanamycin acetyltransferase enzyme from *E. coli* against a panel of aminoglycosides (Radika and Northrop 1984). What accounts for the discrepancy between our data and previous theory and experiments?

We note first that the data in figure 1 inset can be divided into two groups of eight alleles, those with serine and glycine residues at residue 238. These correspond to alleles with catalytic activity above and below  $\sim 10^4 \text{ M}^{-1} \text{ s}^{-1}$ , and resistance above and below  $\sim 10^2 \mu\text{g/mL}$ . (The eight G238 alleles are indistinguishable in the main panel of fig. 1.) G238S has long been recognized to sharply increase cefotaxime MIC [reviewed in Salverda et al. (2010)]. Interestingly, the linear regression of MIC against  $k_{\text{cat}}/K_M$  among just the eight G238 alleles has a steeper slope (0.0135 vs. 0.0105) and a much better fit ( $R^2 = 0.93$  vs. 0.54) than seen among all 16 alleles in figure 1.

Taken together these observations imply that MIC saturates for large values of  $k_{\text{cat}}/K_M$ . One possible explanation for this saturation lies in the assumption underlying Equation (1b), that substrate is limiting relative to the Michaelis constant. In fact, Equation (1b) overestimates the true Michaelis-Menten reaction rate by a factor  $1 + [S]_{\text{lethal}}/K_M$  [compare with Equations (1a) and (1b)]. For those alleles for which we were able to independently estimate  $K_M$ , this quantity is just  $\sim 1.01$  for G238 alleles but  $\sim 1.14$  for 238S alleles [ $K_M$  estimates from table 1;  $[S]_{\text{lethal}}$  taken as equal to the MIC of cells



lacking  $\beta$ -lactamase (Zimmermann and Rosselet 1977), reported to be 11.3  $\mu\text{g}/\text{mL}$  at 25 °C (Knies et al, in prep.) or  $2.4 \times 10^{-5}$  M]. Adjusting the predicted MIC values by this factor (i.e., using Equation (1a) instead (1b) while holding  $[E]_{\text{active}}$  constant) raises the exponent on the power relationship between catalytic velocity and antibiotic resistance across all 16 alleles examined from 0.87 to 0.92 (i.e., closer to 1, the linear expectation).

Another possible explanation for the observed saturation is that some of our best  $\beta$ -lactamase alleles may approach the diffusion limit, as previously observed for TEM-1 in other bacterial species (Hardy and Kirsch 1984; Christensen et al. 1990; Bulychev and Mobashery 1999). Classically (Albery and Knowles 1976), this condition requires  $k_{\text{cat}}/K_M$  values on the order of  $10^8$ – $10^9$   $\text{M}^{-1} \text{s}^{-1}$ . However, it has also long been appreciated that viscosity resulting from macromolecular crowding within bacterial cells can reduce this threshold by two log-orders (Benner 1989). Moreover, enzymatic velocity is attenuated in a continuous fashion as  $k_{\text{cat}}/K_M$  approaches the relevant physical diffusion-limitation rate (Brouwer and Kirsch 1982; Hardy and Kirsch 1984; Bulychev and Mobashery 1999). As the mean  $k_{\text{cat}}/K_M$  among 238S alleles is  $2.78 \times 10^5$   $\text{M}^{-1} \text{s}^{-1}$  (though only  $1.11 \times 10^3$   $\text{M}^{-1} \text{s}^{-1}$  for G238 alleles; table 1), it seems reasonable to suppose that *in vivo* diffusion may further contribute to the fact that for large values of  $k_{\text{cat}}/K_M$ , observed MIC values are lower than predicted.

Admittedly, more recent work has raised two caveats to this line of reasoning. First, for many enzymes  $k_{\text{cat}}/K_M$  exhibits a non-linear response to increasing concentration of crowding agent (e.g., see recent reviews by Zhou et al. 2008; Luby-Phelps 2013; Kuznetsova et al. 2014). Moreover, as noted above, Sarkar et al. (2013) find that using inert, synthetic polymers rather than cellular extracts to simulate intracellular crowding can substantially affect thermostability estimates. To the best of our knowledge, the role of crowding on enzyme kinetics has only been explored with inert, synthetic polymers (Luby-Phelps 2013; Kuznetsova et al. 2014), raising the possibility of still greater complexity in this response.

Overall then, we conclude that while the consideration of TEM-1  $\beta$ -lactamase's behavior in isolation motivates predictions of a linear response in MIC to variation in the  $k_{\text{cat}}/K_M$  [Equation (1b)], the complexity of the cellular milieu in which the enzyme operates suggests the opportunity for more sophisticated models. However, addressing these considerations is well beyond the scope of the present study.

### The Mechanistic Determinants of Sign Epistasis in MIC Remain Obscure

Beyond our interest in the mapping from biochemistry and biophysics to cefotaxime resistance in TEM-1  $\beta$ -lactamase, we also sought the mechanistic basis of the sign epistasis previously described in this system (Weinreich et al. 2006). Specifically, sign epistasis emerges generically from the hypothesis that beneficial mutations commonly require compensatory, stabilizing mutations (Camps et al. 2007; Weinreich 2010; Weinreich and Knies 2013). However, our finding that cefotaxime resistance is unaffected by mutational

effects on thermostability is fatal to that explanation. Others (Martin et al. 2007; Rokyta et al. 2011) have observed that stabilizing selection on a single underlying phenotype can also give rise to sign epistasis. However, in the case of TEM-1  $\beta$ -lactamase, there is little evidence to support the notion that MIC is maximized for any intermediate value of  $k_{\text{cat}}/K_M$  (fig. 1).

Instead, we find considerable sign epistasis already present in  $k_{\text{cat}}/K_M$  (table 4), pushing the mechanism more deeply into the molecular biology of the enzyme. Moreover, we observe substantial antagonistic pleiotropy between  $k_{\text{cat}}/K_M$  and MIC: natural selection favors only one but not the other of the two phenotypes in roughly 25% of the cases examined here (table 4). In other words, the sign epistasis in  $k_{\text{cat}}/K_M$  itself is not sufficient to explain much of the sign epistasis observed in MIC. Importantly, neither of these observations are artifacts of poor experimental resolution (table 3).

### Sign Epistasis and Antagonistic Pleiotropy are “Brittle” Biological Properties

Sign epistasis is a statement about phenotypic rank ordering, and thus survives log transformation of the data. Consequently the sign epistasis in cefotaxime MIC observed in table 4 and previously (Weinreich et al. 2006) already resides in the less than 10% of variance in log-transformed phenotype left unexplained by a purely additive model (fig. 2). While sign epistasis is synonymous with the frustration (in the physicist's sense) imposed on natural selection by the fitness landscape, it thus can already emerge on comparatively “well-behaved” (nearly non-epistatic) fitness landscapes.

To confirm the generality of this observation, we examined several other suitable datasets (Weinreich et al. 2013). For each, we computed the density of sign epistasis and  $R^2$  of the non-epistatic model of mutational effect (supplementary table S1, Supplementary Material online, which in each case conservatively reports the larger of the two  $R^2$  values computed for the raw and log-transformed data). As one might expect, the explanatory power of an additive model is negatively correlated with the density of sign epistasis. On the other hand, the seven independent datasets in which a non-epistatic model is most successful (shown in bold in supplementary table S1, Supplementary Material online, all with  $R^2$  greater than 0.80) exhibit a mean density of sign epistasis (see “Methods”) of 11%. In other words, appreciable sign epistasis does not require dramatic deviations from mutational additivity.

Similarly, antagonistic pleiotropy (AP) frustrates (in the quotidian sense) our attempts to understand the mechanistic basis of sign epistasis. As above, AP is also a statement about discrepancies between rank orders, and therefore also survives log transformation. Thus the 25% density of AP reported in table 4 already resides in the  $\sim 8\%$  of variance in phenotype left unexplained by the power relationship in the inset of figure 1. This in no way undermines the evolutionary importance of AP, which again captures real complexities that genetics can impose on natural selection. Rather, we note that at least in TEM-1  $\beta$ -lactamase, rank order discrepancies

between phenotypes reflect comparatively small (though significant, [table 3](#)) numeric differences. We are unaware of any other datasets in which to test the generality of this observation.

### Summary

Two empirical findings in this study are particularly noteworthy. First, contrary to widely held expectations, *in vitro* measurement of the thermodynamic effects of beneficial mutations are uncorrelated with cefotaxime resistance in TEM-1  $\beta$ -lactamase. We suggest that mutational effects on localized thermostability, as well as kinetic stability may instead make important contributions to antibiotic resistance evolution. Moreover, we emphasize the possibility that components of the cellular milieu, lost during purification, may substantially influence *in vivo* protein stability. Second, MIC appears to saturate as TEM-1 variants achieve increasingly good catalytic kinetics. The saturation of MIC may also reflect important differences between *in vitro* assays and *in vivo* conditions. Both these empirical findings are likely to be echoed in other mechanistic studies of enzyme evolution. Finally and of particular interest for theoreticians, we observe that because both sign epistasis and antagonistic pleiotropy reflect discrepancies in phenotypic rank order, they can emerge from comparatively small quantitative differences in phenotype. Consequently, sign epistasis (both necessary and sufficient for constraint on the number of selectively accessible trajectories to high-fitness genotypes, [Weinreich et al. 2005](#)) can already be observed in systems exhibiting comparatively modest deviations from mutational additivity ([supplementary table S1, Supplementary Material](#) online). And, antagonistic pleiotropy (representing discrepancies in identity of the favored allele for two phenotypes) is shown here for the first time to be widespread in a system in which one phenotype [ $\log(k_{\text{cat}}/K_M)$ ] explains 92% of the variance in another [ $\log(\text{MIC})$ ].

## Materials and Methods

### Cloning

[Weinreich et al. \(2006\)](#) employed 32  $\beta$ -lactamase alleles defined by five point mutations. Because one of those five mutations (g4205, numbering as in [Watson 1988](#)) is upstream of the gene's start codon, that study only employed 16 distinct protein-coding alleles. These protein-coding alleles, on an arabinose-inducible over-expression and purification vector (pBAD Directional TOPO expression kit, Invitrogen, Carlsbad, CA), were kindly provided by Kyle Brown and Mark DePristo. The pBAD vector provides a 28 residue C-terminal linker including a 6xHis tag to facilitate protein binding on a nickel-affinity column. Each construct was transformed into *E. coli* strain DH5 $\alpha$  (Life Technologies, Grand Island, NY).

### Enzyme Purification

$\beta$ -Lactamase purification was performed as follows. Cells grown overnight at 37 °C were diluted 100-fold in Terrific Broth and grown at 37 °C to an OD<sub>600</sub> = 0.6. At this point, the

medium was supplemented with 0.02% arabinose and cells were grown overnight at 18 °C, pelleted, and periplasmic extract was obtained by osmotic shock in 30 mL ice-cold 5 mM MgSO<sub>4</sub>. This extract was sequentially incubated with two 1 mL volumes of equilibrated nickel beads (Qiagen, Valencia, CA) at 4 °C for 60 min, after which combined bound bead volumes were incubated in 30 mL wash buffer (50 mM sodium phosphate pH 6.0, 300 mM NaCl, 10% glycerol) supplemented with 20 mM imidazole. Next, beads were packed in disposable columns (Bio-Rad, Hercules, CA) and washed with five column volumes of wash buffer again supplemented with 20 mM imidazole. Finally, bound  $\beta$ -lactamase was eluted with 5 column-volumes wash buffer supplemented with 100 mM imidazole. Quantity, purity, and activity were confirmed respectively by Bradford assay, SDS-PAGE gel and catalytic activity against ampicillin ( $\lambda = 235$  nm). In our hands this yielded 2–20 mg purified  $\beta$ -lactamase per mL of overnight culture, which was then dialyzed into 200 mM potassium phosphate buffer pH 7.0, combined with an equal volume of glycerol, and stored at –80 °C.

### Enzyme Kinetics

The *in vitro* catalytic activity against cefotaxime (Sigma-Aldrich, St. Louis, MO) for each of the 16 alleles of  $\beta$ -lactamase was measured by  $n = 10$  replicate measurements at 25 °C. Absorbance was measured at 260 nm for each enzyme at each substrate concentration for 200 s on a Biotek Synergy HT spectrophotometer (Winooski, VT) using Corning UV-transparent 96-well flat bottom microtiter plates (Corning, NY). Eight different concentrations of substrate (0, 25, 50, 100, 200, 400, 600, and 800  $\mu\text{M}$ ) were prepared in 100 mM sodium phosphate buffer. (Optimal enzyme concentrations of each allele were determined empirically by screening over the range  $10^3$ – $10^5$   $\mu\text{g}/\mu\text{L}$  of soluble protein.)

For each allele, Michaelis-Menten kinetic parameters  $k_{\text{cat}}$  and  $K_M$  were estimated by fitting nonlinear [[Equation \(1a\)](#)] and linear [[Equation \(1b\)](#)] models to each replicate velocity measurement as a function of substrate concentration. For each replicate, the best fitting Michaelis-Menten model (linear or nonlinear) was chosen by small sample AIC (AIC<sub>S</sub>, [Burnham and Anderson 2002](#)) and for each allele, the mean and standard error of  $k_{\text{cat}}/K_M$  across best-model-fit estimates were recorded. Additionally, mean and standard error of individual  $k_{\text{cat}}$  and  $K_M$  values were recorded across those replicates for which the nonlinear model had the better (lower) AIC<sub>S</sub> score.

We follow [Xiao et al. \(2015\)](#) in assuming that the presence of a histidine affinity tag on the TEM-1  $\beta$ -lactamase does not substantially influence catalytic kinetic data, although we are unaware of any systematic examinations of this hypothesis.

### Enzyme Native-Form Thermodynamic Stability

Native-form thermodynamic stability was determined for each allele by circular dichroism (CD) on a Jasco J-815 CD (Easton, MD). Briefly, purified enzyme was dialyzed into 200 mM potassium phosphate pH 7.0 supplemented with 4% glycerol and diluted to 1 mM, which we found maximized signal to noise ratio. After equilibrating each enzyme at room

temperature for 10 min, circular dichroism at 223 nm was characterized by raising sample temperature 5 °C/min from 25 to 70 °C. We then determined melting temperature ( $T_m$ ) and van't Hoff enthalpy ( $\Delta H$ ) by fitting data to a two-state transition melting curve in PSIPLOT (Pearl River, NY). Because  $\beta$ -lactamase CD profiles are reversible (not shown), Gibbs free energy ( $\Delta G$ ) of unfolding was calculated from the van't Hoff enthalpy at 25 °C as  $\Delta G = \Delta H(1 - T/T_m)$  (see Equation 5 in Greenfield 2006, where  $T = 298.15^\circ\text{K}$  and  $\Delta C_p = 0$ ). In total, three experimental replicate measures for each of one biological replicate was performed for each allele.

### Cefotaxime MIC Assays

MIC assays for all 32  $\beta$ -lactamase constructs previously described (Weinreich et al. 2006), were performed at 25 °C by the broth microdilution method (NCCLS 2004; Weinreich et al. 2006). Briefly, starting from single colonies, cells were grown to stationary phase ( $\text{OD}_{600} > 1.8$ ,  $\sim 1 \times 10^9$  cfu/mL) with shaking at 25 °C in cation-adjusted Mueller Hinton Broth (MHB) or Luria Broth (LB; both Becton Dickinson, Franklin Lakes, NJ). Experimental strains (but not control strains, NCCLS 2004) were grown in media supplemented with 50  $\mu\text{g}/\text{mL}$  of ampicillin to maintain the plasmid. Cultures were next supplemented with glycerol (15% v/v), divided into enough aliquots to perform all assays, and frozen at  $-80^\circ\text{F}$ .

39  $\sqrt{2}$ -fold dilutions of cefotaxime (Sigma-Aldrich, St. Louis, MO) in 0.1M phosphate buffer were prepared from a single 81.9 mg/mL stock, and stored in single-use aliquots at  $-80^\circ\text{F}$  to guarantee long-term stability (Nickolai et al. 1985).

Finally, each  $\sqrt{2}$ -fold antibiotic dilution (further diluted 1:10 in MHB after thawing) and cells (diluted 1:1000 in MHB after thawing) were combined (1:1 v/v; total volume 200  $\mu\text{l}$ ) in sterile 96-well flat-bottom polystyrene plates (VWR, West Chester, PA). These were sealed with sealing film (ThermoFisher Scientific, Waltham, MA) and incubated at 25 °C.  $\text{OD}_{600}$  was assayed 96 times at 30 min intervals, each after shaking for 30 s, on an Envision 2013 Multilabel Plate Reader (Perkin-Elmer, Waltham, MA). MIC was recorded as the minimum antibiotic concentration that displayed no change in  $\text{OD}_{600}$  after 48 h. One allele (- + + + +; mutations enumerated in 5'-to-3' order as in Weinreich et al. 2006) exhibited growth even at this highest cefotaxime concentration (4096  $\mu\text{g}/\text{mL}$ ). Consequently, we prepared two additional  $\sqrt{2}$ -fold dilutions (8.19 and 5.79  $\mu\text{g}/\text{mL}$ ) to identify its MIC.

All MIC assays were performed in triplicate.

Our protocol differs from the CLSI/NCCLS standard in three respects. First,  $\sqrt{2}$ -fold dilutions were employed (Weinreich et al. 2006) to increase resolution of the assay. Second, cells went through a single freeze-thaw cycle before the assay was performed. This work was part of a larger study (Knies et al., in prep) to spectrophotometrically measure full growth kinetics of these same 32 alleles at six temperatures between 20 °C and 41 °C. Because this larger experiment couldn't be performed on a single day, we introduced a single freeze-thaw cycle in order to avoid variability across replicate liquid culture growth within strains. Third, test cultures were incubated for 48 h rather than 24 h because the no-antibiotic

positive control cultures took 48 h to reach stationary phase at 25 °C. Importantly, all positive control MIC assay results (NCCLS 2004) were as expected.

MIC data were then subdivided into two sets of 16 alleles each: those with and without the non-coding g4205a mutation. This allows direct comparisons between biochemical and biophysical phenotypes (naturally assessed for just 16 protein-coding alleles) and MIC in two genetic backgrounds (designated g4205 and 4205a). Because analyses based on these two sets of alleles were largely indistinguishable, and for simplicity we only report results based on MIC values from the g4205 genetic background. On both backgrounds, these four missense mutations increase cefotaxime MIC  $\sim 1500$ -fold.

### Characterizing Epistasis with the Walsh Transformation

Epistasis describes non-linear interaction(s) among mutations in determining phenotype (Phillips 1998, 2008). More colloquially, epistasis represents our surprise at the phenotype conferred by some set of mutations given the phenotypes observed for subsets of those same mutations (Weinreich et al. 2013). Interest has traditionally focused on epistasis between pairs of mutations. However given  $L$  mutations, interactions may in principle exist among any of the  $2^L$  possible subsets of these. An interaction involving  $k > 1$  mutations is said to be  $k^{\text{th}}$  order; among  $L$  mutations there are thus

$\binom{L}{k}$  interactions of order  $k$ .

A dataset containing phenotypic data for all combinations of  $L$  mutations is called combinatorially complete (Weinreich et al. 2013). The Walsh transformation (Goldberg 1989) converts a vector containing a combinatorially complete phenotypic dataset into a new vector containing orthogonal, independent components corresponding to the phenotypic contributions of each of the  $2^L$  subsets of these mutations. First order terms represent the contribution to phenotype of each mutation in isolation and terms of order  $k > 1$  represent epistatic interactions. [This new vector is easily computed, e.g., with the `hadamard()` function in MATLAB, MathWorks, Natick, MA. See Box 1 in Weinreich et al. (2013) for further details.] The Walsh transformation is numerically equivalent to computing each main effect and interaction term in a fully factorial ANOVA design (Reeves and Wright 1995; Li et al. 2006) and also to the discrete Fourier decomposition of a function defined on a hypercube (Pumir and Shraiman 2011; Neidhart et al. 2013). The interested reader is directed to Poelwijk et al. (2016) for two other schemes to compute higher-order epistatic effects.

When the phenotype in question is fitness, first order Walsh coefficients are proportional to classical selection coefficients and second order Walsh coefficients are proportional to classical pairwise epistasis coefficients (Weinreich et al. 2013). Consequently, Weinreich et al. (2013) proposed using this framework to allow computation of epistatic coefficients of all order. And regardless the phenotype, perfect additivity among mutations is equivalent to all second- and



higher-order Walsh coefficients (i.e., all epistatic terms) being equal to zero.

To summarize the magnitude of epistasis underlying each phenotype examined, we report the mean squared values

( $\pm$  standard deviation) of the  $\binom{L}{k}$  Walsh coefficients at

each interaction order. Values are squared because individual Walsh coefficients can be positive or negative. Values were also normalized by the grand average of each phenotype, in order to allow comparison across phenotypes. Additionally, we report the coefficient of determination ( $R^2$ ) between observed phenotypes and those predicted by successive models incorporating only the lowest order  $k = 1, 2, \dots, L$  terms. To do this, we took advantage of the fact that the Walsh transform of a vector of Walsh coefficients recovers the initial phenotypic vector (Weinreich et al. 2013). Thus, for each vector of Walsh coefficients computed from our data, we set the appropriate higher-order terms to zero, computed a new vector of phenotypes, and computed  $R^2$  between the new vector and the original data. (This approach is formally equivalent to computing the explanatory power of additive terms in an analysis of variance.)

### The Density of Sign Epistasis and Antagonistic Pleiotropy

Sign epistasis means a mutation fails to influence some phenotype in the same direction on all genetic backgrounds examined. Of particular interest for evolutionary genetics are cases of mutations that are beneficial on only some genetic backgrounds. We define the density of sign epistasis at a locus as the fraction of genetic backgrounds on which that mutation fails to be significantly beneficial. For example, table 4 illustrates that the A42G mutation significantly increases  $k_{cat}/K_M$  on five backgrounds but not on the other three examined. On the assumption that increasing catalytic efficiency is beneficial, the density of sign epistasis for this phenotype ascribed to A42G is thus  $3/8 = 37.5\%$ . In contrast the density of sign epistasis for  $k_{cat}/K_M$  is 0% at G238S. Finally, the density of sign epistasis for a phenotype across a dataset is defined as the average mean density of sign epistasis among all mutations in the dataset.

Antagonistic pleiotropy (AP) means that a mutation affects two phenotypes in opposite directions. Given our interest in adaptation, we follow Remold (2012) and restrict our definition of AP to those cases in which mutations are significantly beneficial for only one of the two phenotypes. We define the density of antagonistic pleiotropy in a dataset as the fraction of genetic backgrounds on which that a mutation exhibits antagonistic pleiotropy.

### Statistics

Statistical significance of differences in phenotypes ( $k_{cat}/K_M$ ,  $k_{cat}$ ,  $K_M$ ,  $T_{mv}$ , and  $\Delta G$ ) between  $\beta$ -lactamase alleles was calculated by Welch's or Student's  $t$ -test (Sokal and Rohlf 1995). Significance values were corrected for multiple tests using the Holm–Bonferroni method (Holm 1979). Significance in rank correlations were computed with the Spearman rank

correlation  $\rho$  (Sokal and Rohlf 1995) and statistical significance was assessed by purpose-built MATLAB permutation test over  $10^6$  realizations.

### $\Delta\Delta G$ Computation

$\Delta\Delta G$  values of all protein-coding alleles were computed relative to the 1BTL PDB crystal structure of TEM-1 (Jelsch et al. 1993) using two public domain software packages. The graphical user interface version of FoldX (Van Durme et al. 2011, downloaded May 31, 2015) was run from inside YASARA (Krieger and Vriend 2014, downloaded May 31, 2015) using standard parameter values (3 runs at 298°K in pH 7.0 with ionic strength  $5 \times 100$  and Van der Waal design 2). Queries were also performed with the web-based interface for PoPMuSiC 2.1 (Dehouck et al. 2011, last accessed May 31, 2015) in manual mode.

### Supplementary Material

Supplementary data is available at *Molecular Biology and Evolution* online.

### Acknowledgments

Mark DePristo first suggested investigating the kinetic and thermostability properties of the TEM-1 alleles involved in cefotaxime resistance evolution. This work was supported by National Institute of Health (grant numbers R01GM095728 to D.M.W. and 1F32GM086105 to J.L.K.). Kinetics assays were performed with the generous assistance of members of Stephen Helfand's lab at Brown University. Circular dichroism assays were conducted using the Rhode Island NSF/EPSCoR Proteomics Shared Resource Facility, which is supported in part by the National Science Foundation (EPSCoR grant number 1004057), the National Institutes of Health (grant numbers 1S10RR020923 and S10RR027027), a Rhode Island Science and Technology Advisory Council grant, and the Division of Biology and Medicine, Brown University. We are also grateful for thoughtful comments provided on this manuscript by Yousif Shamoo, Alejandro Vila and anonymous reviewers.

### References

- Albery WJ, Knowles JR. 1976. Evolution of enzyme function and the development of catalytic efficiency. *Biochemistry* 15:5631–5640.
- Ambler RP, Coulson AFW, Frère J-M, Ghuysen J-M, Joris B, Forsman M, Levesque RC, Tiraby G, Waley SG. 1991. A standard numbering scheme for the Class A  $\beta$ -lactamases. *Biochem J*. 276:269–272.
- Baker D, Agard DA. 1994. Kinetics versus thermodynamics in protein folding. *Biochemistry* 33:7505–7509.
- Baldwin MW, Toda Y, Nakagita T, O'Connell MJ, Klasing KC, Misaka T, Edwards SV, Liberles SD. 2014. Evolution of sweet taste perception in hummingbirds by transformation of the ancestral umami receptor. *Science* 345:929–933.
- Beadle BM, McGovern SL, Patera A, Shoichet BK. 1999. Functional analyses of AmpC  $\beta$ -lactamase through differential stability. *Protein Sci*. 8:1816–1824.
- Beadle BM, Shoichet BK. 2002. Structural bases of stability-function tradeoffs in enzymes. *J Mol Biol*. 321:285–296.
- Benner SA. 1989. Enzyme kinetics and molecular evolution. *Chem Rev*. 89:789–806.



- Bershtein S, Goldin K, Tawfik DS. 2008. Intense neutral drifts yield robust and evolvable consensus proteins. *J Mol Biol.* 379:1029–1044.
- Bershtein S, Segal M, Bekerman R, Tokuriki N, Tawfik DS. 2006. Robustness-epistasis link shapes the fitness landscape of a randomly drifting protein. *Nature* 444:929–932.
- Bershtein S, Serohijos AWR, Bhattacharyya S, Manhart M, Choi J-M, Mu W, Zhou J, Shakhnovich EI. 2015. Protein homeostasis imposes a barrier on functional integration of horizontally transferred genes in bacteria. *PLoS Genet.* 11:e1005612.
- Bershtein S, Wu W, Shakhnovich EI. 2012. Soluble oligomerization provides a beneficial fitness effect on destabilizing mutations. *Proc Natl Acad Sci USA.* 109:4857–4862.
- Besenmatter W, Kast P, Hilvert D. 2007. Relative tolerance of mesostable and thermostable protein homologs to extensive mutation. *Proteins Struct Funct Bioinf.* 66:500–506.
- Blance SJ, Williams NL, Preston ZA, Bishara J, Smyth MS, Maxwell A. 2000. Temperature-sensitive suppressor mutations of the Escherichia coli DNA gyrase B protein. *Protein Sci.* 9:1035–1037.
- Blazquez J, Morosini MI, Negri MC, Gonzalez-Leiza M, Baquero F. 1995. Single amino acid replacements at positions altered in naturally occurring extended-spectrum TEM  $\beta$ -lactamases. *Antimicrob Agents Chemother.* 39:145–149.
- Bloom AJD, Labthavikul ST, Otey CR, Arnold FH. 2006. Protein stability promotes evolvability. *Proc Natl Acad Sci USA.* 103:5869–5874.
- Bloom AJD, Wilke CO, Arnold FH, Adami C. 2004. Stability and the evolvability of function in a model protein. *Biophys J.* 86:2758–2764.
- Bloom JD, Silberg JJ, Wilke CO, Drummond DA, Adami C, Arnold FH. 2005. Thermodynamic prediction of protein neutrality. *Proc Natl Acad Sci USA.* 102:606–611.
- Bridgham JT, Ortlund EA, Thornton JW. 2009. An epistatic ratchet constrains the direction of glucocorticoid receptor evolution. *Nature* 461:515–519.
- Brouwer AC, Kirsch JF. 1982. Investigation of diffusion-limited rates of chymotrypsin reactions by viscosity variation. *Biochemistry* 21: 1302–1307.
- Brown NG, Pennington JM, Huang W, Ayvaz T, Palzkill T. 2010. Multiple global suppressors of protein stability defects facilitate the evolution of extended-spectrum TEM  $\beta$ -lactamases. *J Mol Biol.* 404:832–846.
- Bulychev A, Mobashery S. 1999. Class C  $\beta$ -lactamases operate at the diffusion limit for turnover of their preferred cephalosporin substrates. *Antimicrob Agents Chemother.* 43:1743–1746.
- Burnham K, Anderson D. 2002. Model selection and multi-model inference: a practical information-theoretic approach. New York: Springer-Verlag.
- Camps M, Herman A, Loh E, Loeb LA. 2007. Genetic constraints on protein evolution. *Crit Rev Biochem Mol Biol.* 42:313–326.
- Cantu C, Palzkill T. 1998. The role of residue 238 of TEM-1  $\beta$ -lactamase in the hydrolysis of extended-spectrum antibiotics. *J Biol Chem.* 273:26603–26609.
- Capra EJ, Perchuk BS, Skerker JM, Laub MT. 2012. Adaptive mutations that prevent crosstalk enable the expansion of paralogous signaling protein families. *Cell* 150:222–232.
- Chen Y, Delmas J, Sirot J, Shoichet B, Bonnet R. 2005. Atomic resolution structures of CTX-M  $\beta$ -lactamases: extended spectrum activities from increased mobility and decreased stability. *J Mol Biol.* 348:349–362.
- Christensen H, Martin MT, Waley SG. 1990.  $\beta$ -lactamases as fully efficient enzymes. Determination of all the rate constants in the acyl-enzyme mechanism. *Biochem J.* 266:853–861.
- Christiansen A, Wang Q, Cheung MS, Wittung-Stafshede P. 2013. Effects of macromolecular crowding agents on protein folding in vitro and in silico. *Biophys Rev.* 5:137–145.
- Couñago R, Chen S, Shamoo Y. 2006. In vivo molecular evolution reveals biophysical origins of organismal fitness. *Mol. Cell* 22:441–449.
- Couñago R, Wilson CJ, Peña MI, Wittung-Stafshede P, Shamoo Y. 2008. An adaptive mutation in adenylate kinase that increases organismal fitness is linked to stability–activity trade-offs. *Protein Eng Des Sel.* 21:19–27.
- Dean AM, Thornton JW. 2007. Mechanistic approaches to the study of evolution: the functional synthesis. *Nat Rev Genet.* 8:675–688.
- Dehouck Y, Kwasiroch JM, Gilis D, Rooman M. 2011. PoPMuSiC 2.1: a web server for the estimation of protein stability changes upon mutation and sequence optimality. *BMC Bioinf.* 12:151.
- Dellus-Gur E, Elias M, Caselli E, Prati F, Salverda MLM, de Visser JAGM, Fraser JS, Tawfik DS. 2015. Negative epistasis and evolvability in TEM-1  $\beta$ -lactamase—the thin line between an enzyme’s conformational freedom and disorder. *J Mol Biol.* 427:2396–2409.
- Dellus-Gur E, Toth-Petroczy A, Elias M, Tawfik DS. 2013. What makes a protein fold amenable to functional innovation? Fold polarity and stability trade-offs. *J Mol Biol.* 425:2609–2621.
- DePristo MA, Weinreich DM, Hartl DL. 2005. Missense meandering through sequence space: a biophysical perspective on protein evolution. *Nat Rev Genet.* 6:678–687.
- Elcock AH. 2010. Models of macromolecular crowding effects and the need for quantitative comparisons with experiment. *Curr Opin Struct Biol.* 20:196–206.
- Fasan R, Chen MM, Crook NC, Arnold FH. 2007. Engineered alkane-hydroxylating cytochrome P450BM3 exhibiting native-like catalytic properties. *Angew Chem.* 46:8414–8418.
- Field SF, Matz MV. 2010. Retracing evolution of red fluorescence in GFP-like proteins from Faviina corals. *Mol Biol Evol.* 27:225–233.
- Firnberg E, Labonte JW, Gray JJ, Ostermeier M. 2014. A comprehensive, high-resolution map of a gene’s fitness landscape. *Mol Biol Evol.* 31:1581–1592.
- Frère J-M, Dubus A, Galleni M, Matagne A, Amicosante G. 1999. Mechanistic diversity of  $\beta$ -lactamases. *Biochem Soc Trans.* 27:58–63.
- Ghaemmaghami S, Oas TG. 2001. Quantitative protein stability measurement in vivo. *Nat Struct Mol Biol.* 8:879–882.
- Goldberg D. 1989. Genetic algorithms and Walsh Functions: Part I, A gentle introduction. *Complex Syst.* 3:129–152.
- Gong LI, Suchard MA, Bloom JD. 2013. Stability-mediated epistasis constrains the evolution of an influenza protein. *eLife* 2:00631.
- González LJ, Bahr G, Nakashige TG, Nolan EM, Bonomo RA, Vila AJ. 2016a. Membrane anchoring stabilizes and favors secretion of New Delhi metallo- $\beta$ -lactamase. *Nat Chem Biol.* 12:516–522.
- González MM, Abriata LA, Tomatis PE, Vila AJ. 2016b. Optimization of conformational dynamics in an epistatic evolutionary trajectory. *Mol Biol Evol.* 33:1768–1776.
- Greenfield NJ. 2006. Using circular dichroism collected as a function of temperature to determine the thermodynamics of protein unfolding and binding interactions. *Nat Protoc.* 1:2527–2535.
- Hall BG. 2002. Predicting evolution by in vitro evolution requires determining evolutionary pathways. *Antimicrob Agents Chemother.* 46:3035–3038.
- Hardy LW, Kirsch JF. 1984. Diffusion-limited component reactions catalyzed by *Bacillus cereus*  $\beta$ -lactamase I. *Biochemistry* 32:1275–1282.
- Harms MJ, Thornton JW. 2013. Evolutionary biochemistry: revealing the historical and physical causes of protein properties. *Nat Rev Genet.* 14:559–571.
- Hecky J, Müller KM. 2005. Structural perturbation and compensation by directed evolution at physiological temperature leads to thermostabilization of  $\beta$ -lactamase. *Biochemistry* 44:12640–12654.
- Holm S. 1979. A simple sequentially rejective multiple test procedure. *Scand Stat Theory Appl.* 6:67–70.
- Huang W, Palzkill T. 1997. A natural polymorphism in  $\beta$ -lactamase is a global suppressor. *Proc Natl Acad Sci USA.* 94:8801–8806.
- Ignatova Z, Krishnan B, Bombardier JP, Marcelino AMC, Hong J, Gierasch LM. 2007. From the test tube to the cell: exploring the folding and aggregation of a  $\beta$ -clam protein. *Peptide Sci.* 88:157–163.
- Jacoby GA, Bush K. 2005. TEM Extended-Spectrum and Inhibitor Resistant  $\beta$ -Lactamases [Internet]. Last accessed May 19, 2005. Available from: <http://www.lahey.org/Studies/temtable.asp>; now maintained at <https://www.ncbi.nlm.nih.gov/pathogens/beta-lactamase-data-resources/>.
- Jacquier H, Birgy A, Le Nagard H, Mechulam Y, Schmitt E, Glodt J, Bercot B, Petit E, Poulain J, Barnaud G, et al. 2013. Capturing the mutational

- landscape of the  $\beta$ -lactamase TEM-1. *Proc Natl Acad Sci USA*. 110:13067–13072.
- Jelsch C, Mourey L, Masson J-M, Samama J-P. 1993. Crystal structure of *Escherichia coli* TEM1  $\beta$ -lactamase at 1.8 Å resolution. *Proteins Struct Funct Bioinf*. 16:364–383.
- Kather I, Jakob RP, Dobbek H, Schmid FX. 2008. Increased folding stability of TEM-1  $\beta$ -lactamase by in vitro selection. *J Mol Biol*. 383:238–251.
- Krieger E, Vriend G. 2014. YASARA view—molecular graphics for all devices—from smartphones to workstations. *Bioinformatics* 30:2981–2982.
- Kuznetsova IM, Turoverovov KK, Uversky UN. 2014. What macromolecular crowding can do to a protein. *Int J Mol Sci*. 15:23090–23140.
- Li X, Sudrasanam N, Frey DD. 2006. Regularities in data from factorial experiments. *Complexity* 11:32–45.
- Luby-Phelps K. 2013. The physical chemistry of cytoplasm and its influence on cell function: an update. *Mol Biol Cell* 24:2593–2596.
- Lunzer M, Miller SP, Felsheim R, Dean AM. 2005. The biochemical architecture of an ancient adaptive landscape. *Science* 310:499–501.
- Martin G, Elena SF, Lenormand T. 2007. Distributions of epistasis in microbes fit predictions from a fitness landscape model. *Nat Genet*. 39:555–560.
- Maynard SJ. 1970. Natural selection and the concept of a protein space. *Nature* 225:563–565.
- Meiering EM, Serrano L, Fersht AR. 1992. Effect of active site residues in barnase on activity and stability. *J Mol Biol*. 225:585–589.
- Meini M-R, Tomatis PE, Weinreich DM, Vila AJ. 2015. Quantitative description of a protein fitness landscape based on molecular features. *Mol Biol Evol*. 32:1774–1787.
- NCCLS. 2004. Performance standards for antimicrobial susceptibility testing: Fourteenth informational supplement. Wayne, PA: NCCLS.
- Neidhart J, Szendro IG, Hart J. 2013. Exact results for amplitude spectra of fitness landscapes. *J Theor Biol*. 332:218–227.
- Nickolai DJ, Lammel CJ, Byford BA, Morris JH, Kaplan EB, Hadley WK, Brooks GF. 1985. Effects of storage temperature and pH on the stability of eleven  $\beta$ -lactam antibiotics in MIC trays. *J Clin Microbiol*. 21:366–370.
- Nikaido H, Normark S. 1987. Sensitivity of *Escherichia coli* to various  $\beta$ -lactams is determined by the interplay of outer membrane permeability and degradation by periplasmic  $\beta$ -lactamases: a quantitative prediction treatment. *Mol Microbiol*. 1:29–36.
- Orencia MC, Yoon JS, Ness JE, Stemmer WPC, Stevens RD. 2001. Predicting the emergence of antibiotic resistance by directed evolution and structural analysis. *Nat Struct Biol*. 8:238–242.
- Palmer AC, Toprak E, Baym M, Kim S, Veres A, Bershtein S, Kishony R. 2015. Delayed commitment to evolutionary fate in antibiotic resistance fitness landscapes. *Nat Commun*. 6:7385.
- Patel MP, Fryszczyn BG, Palzkill T. 2015. Characterization of the global stabilizing substitution A77V and its role in the evolution of CTX-M  $\beta$ -lactamases. *Antimicrob Agents Chemother*. 59:6741–6748.
- Peña MI, Davlieva M, Bennett MR, Olson JS, Shamoo Y. 2010. Evolutionary fates within a microbial population highlight an essential role for protein folding during natural selection. *Mol Syst Biol*. 6:387.
- Phillips PC. 2008. Epistasis—the essential role of gene interactions in the structure and evolution of genetic systems. *Nat Rev Genet*. 9:855–867.
- Phillips PC. 1998. The language of gene interaction. *Genetics* 149:1167–1171.
- Poelwijk FJ, Krishna V, Ranganathan R. 2016. The context-dependence of mutations: a linkage of formalisms. *PLoS Comput Biol*. 12:e1004771.
- Pumir A, Shraiman B. 2011. Epistasis in a model of molecular signal transduction. *PLoS Comput Biol*. 7:e1001134.
- Radika K, Northrop DB. 1984. Correlation of antibiotic resistance with  $V_{max}/K_M$  ratio of enzymatic modification of aminoglycosides by kanamycin acetyltransferase. *Antimicrob Agents Chemother*. 25:479–482.
- Raquet X, Lamotte-Brasseur J, Fonze E, Goussard S, Courvalin P, Frère J-M. 1994. TEM  $\beta$ -lactamase mutants hydrolysing third-generation cephalosporins. *J Mol Biol*. 244:625–639.
- Raquet X, Vanhove M, Lamotte-Brasseur J, Goussard S, Courvalin P, Frère J-M. 1995. Stability of TEM  $\beta$ -lactamase mutants hydrolysing third generation cephalosporins. *Proteins* 23:63–72.
- Reeves C, Wright C. 1995. Epistasis in genetic algorithms: An experimental design perspective. In: Eshelman LJ, editor. Proceedings of the 6th International Conference on Genetic Algorithms. San Francisco: Morgan Kaufmann Publishers, Inc. p. 624.
- Remold S. 2012. Understanding specialism when the jack of all trades can be the master of all. *Proc Roy Soc B* 279:4861–4869.
- Rodrigues JV, Bershtein S, Li A, Lozovsky ER, Hartl DL, Shakhnovich EI. 2016. Biophysical principles predict fitness landscapes of drug resistance. *Proc Natl Acad Sci USA*. 113:E1470–E1478.
- Rokyta DR, Joyce P, Caudle SB, Miller C, Beisel CJ, Wichman HA. 2011. Epistasis between beneficial mutations and the phenotype-to-fitness map for a ssDNA virus. *PLoS Genet*. 7:e1002075.
- Rosenblum EB, Römpfer H, Schöneberg T, Hoekstra HE. 2010. Molecular and functional basis of phenotypic convergence in white lizards at White Sands. *Proc Natl Acad Sci USA*. 107:2113–2117.
- Salverda MLM, De Visser JAGM, Barlow M. 2010. Natural evolution of TEM-1  $\beta$ -lactamase: experimental reconstruction and clinical relevance. *FEMS Microbiol Rev*. 34:1015–1036.
- Sánchez IE, Tejero J, Gómez-Moreno C, Medina M, Serrano L. 2006. Point mutations in protein globular domains: contributions from function, stability and misfolding. *J Mol Biol*. 363:422–432.
- Sanchez-Ruiz JM. 2010. Protein kinetic stability. *Biophys Chem*. 148:1–15.
- Sarkar M, Smith AE, Pielak GJ. 2013. Impact of reconstituted cytosol on protein stability. *Proc Natl Acad Sci USA*. 110:19342–19347.
- Shoichet BK, Baase WA, Kuroki R, Matthews BW. 1995. A relationship between protein stability and protein function. *Proc Natl Acad Sci USA*. 92:452–456.
- Sideraki V, Huang W, Palzkill T, Gilbert HF. 2001. A secondary drug resistance mutation of TEM-1  $\beta$ -lactamase that suppresses misfolding and aggregation. *Proc Natl Acad Sci USA*. 98:283–288.
- Singh MK, Dominy BN. 2012. The evolution of cefotaximase activity in the TEM  $\beta$ -lactamase. *J Mol Biol*. 415:205–220.
- Sokal RR, Rohlf FJ. 1995. Biometry. New York: W.H. Freeman and Company.
- Stemmer WPC. 1994. Rapid evolution of a protein *in vitro* by DNA shuffling. *Nature* 370:389–391.
- Stiffler MA, Hekstra Doeke R, Ranganathan R. 2015. Evolvability as a function of purifying selection in TEM-1  $\beta$ -lactamase. *Cell* 160:882–892.
- Teilum K, Olsen JG, Kragelund BB. 2011. Protein stability, flexibility and function. *Biochim Biophys Acta Proteins Proteomics* 1814:969–976.
- Thomas VL, McReynolds AC, Shoichet BK. 2010. Structural bases for stability-function tradeoffs in antibiotic resistance. *J Mol Biol*. 396:47–59.
- Tokuriki N, Stricher F, Serrano L, Tawfik DS. 2008. How protein stability and new functions trade off. *PLoS Comp Biol*. 4:e1000002.
- Tokuriki N, Tawfik DS. 2009. Stability effects of mutations and protein evolvability. *Curr Opin Struct Biol*. 19:596–604.
- Tomatis PE, Fablane SM, Simona F, Carloni P, Sutton BJ, Vila AJ. 2008. Adaptive protein evolution grants organismal fitness by improving catalysis and flexibility. *Proc Natl Acad Sci USA*. 105:20605–20610.
- Tufts DM, Natarajan C, Revsbech IG, Projecto-Garcia J, Hoffmann FG, Weber RE, Fago A, Moriyama H, Storz JF. 2015. Epistasis constrains mutational pathways of hemoglobin adaptation in high-altitude Pikas. *Mol Biol Evol*. 32:287–298.
- Van Durme J, Delgado J, Stricher F, Serrano L, Schymkowitz J, Rousseau F. 2011. A graphical interface for the FoldX forcefield. *Bioinformatics* 27:1711–1712.
- Vanhove M, Guillaume G, Ledet P, Richards JH, Pain RH, Frère J-M. 1997. Kinetic and thermodynamic consequences of the removal of the Cis-77-Cis-123 disulphide bond for the folding of TEM-1  $\beta$ -lactamase. *Biochem J*. 15:413–417.
- Walkiewicz K, Benitez Cardenas AS, Sun C, Bacorn C, Saxer G, Shamoo Y. 2012. Small changes in enzyme function can lead to surprisingly large fitness effects during adaptive evolution of antibiotic resistance. *Proc Natl Acad Sci USA*. 109:21408–21413.

- Walsh C. 2003. Antibiotics: actions, origins, resistance. Washington, DC: American Society for Microbiology.
- Wang X, Minasov G, Shoichet BK. 2002. Evolution of an antibiotic resistance enzyme constrained by stability and activity trade-offs. *J Mol Biol.* 320:85–95.
- Watson N. 1988. A new revision of the sequence of plasmid pBR322. *Gene* 70:399–403.
- Weinreich DM. 2010. Predicting molecular evolutionary trajectories in principle and in practice. In: Encyclopedia of Life Sciences (ELS). Chichester, UK: John Wiley & Sons.
- Weinreich DM, Delaney NF, DePristo MA, Hartl DL. 2006. Darwinian evolution can follow only very few mutational paths to fitter proteins. *Science* 312:111–114.
- Weinreich DM, Knies JL. 2013. Fisher's geometric model of adaptation meets the functional synthesis: data on pairwise epistasis for fitness yields insights into the shape and size of phenotypic space. *Evolution* 67:2957–2972.
- Weinreich DM, Lan Y, Wylie CS, Heckendorn RB. 2013. Should evolutionary geneticists worry about high order epistasis? *Curr Opin Dev Genet.* 23:700–707.
- Weinreich DM, Watson RA, Chao L. 2005. Perspective: sign epistasis and genetic constraint on evolutionary trajectories. *Evolution* 59: 1165–1174.
- Wylie CS, Shakhnovich EI. 2011. A biophysical protein folding model accounts for mutational fitness effects in viruses. *Proc Natl Acad Sci USA.* 108:9916–9921.
- Xiao H, Nasertorabi F, Choi S-h, Han GW, Reed SA, Stevens RC, Schultz PG. 2015. Exploring the potential impact of an expanded genetic code on protein function. *Proc Natl Acad Sci USA.* 112: 6961–6966.
- Zeldovich KB, Chen PQ, Shakhnovich EI. 2007. Protein stability imposes limits on organism complexity and speed of molecular evolution. *Proc Natl Acad Sci USA.* 104:16152–16157.
- Zhi W, Srere PA, Evans CT. 1991. Conformational stability of pig citrate synthase and some active-site mutants. *Biochemistry* 30:9281–9286.
- Zhou H-X, Rivas G, Minton AP. 2008. Macromolecular crowding and confinement: biochemical, biophysical, and potential physiological consequences. *Annu Rev Biophys.* 37:375–397.
- Zimmerman SB, Trach SO. 1991. Estimation of macromolecule concentrations and excluded volume effects for the cytoplasm of *Escherichia coli*. *J Mol Biol.* 222:599–620.
- Zimmermann W, Rosselet A. 1977. Function of the outer membrane of *Escherichia coli* as a permeability barrier to  $\beta$ -lactam antibiotics. *Antimicrob Agents Chemother.* 12:368–372.
